# Supplementary material
Source: publisher site journal article supplement (https://www.dovepress.com/article/419502)
Supplement: Supplementary file 1 [file get_supplementary_file.php]

**Original article**

**Supporting Information**

# Long-Circulating Lipid Nanospheres Loaded with Flurbiprofen Axetil for Targeted Rheumatoid Arthritis Treatment

**Supporting Figures**

**Fig. S1.** Synthesis diagram of DSPE-PEG2000-cRGD from DSPE-PEG2000-Mal and cRGD at room temperature. cRGD, cyclic arginine-glycine-aspartic acid peptide; DSPE, distearoyl phosphatidyl ethanolamine; Mal, maleimide; PEG, polyethylene glycol

**Fig. S2.** 1H NMR spectrum of DSPE-PEG2000-cRGD in DMSO-*d*6 (400 MHz).

**Fig. S3.** Hemolytic potential of the prepared formulations.

**Supporting tables**

**Table S1.** Actual values of independent variables at different levels.

**Table S2.** Experimental values of independent and dependent variables used in the central composite design (n = 3).

**Table S3.** Observed and predicted values of particle size and encapsulation efficiency under optimum conditions (n = 3).

**Table S4.** Physical characterization of lipid nanospheres (LN).

**Table S5.** Stability of FA-SLN and cRGD-FA-SLN at 4 °C.

**Table S6.** Long-term stability of FA-SLN and cRGD-FA-SLN at 4 °C.

**Table S7.** Stability of FA-SLN and cRGD-FA-SLN at 30 °C.

**Table S8.** Pharmacokinetic parameters of FA in the plasma of healthy rats treated with different formulations.

**Table S9.** Pharmacokinetic parameters of FA in the plasma of collagen-induced arthritic rats treated with different formulations.

**Table S10.** Heat pain threshold of collagen-induced arthritic rats after various treatments.

**Table S11.** Effect of various treatments on the torsional response of collagen-induced arthritic rats intraperitoneally injected with acetic acid.


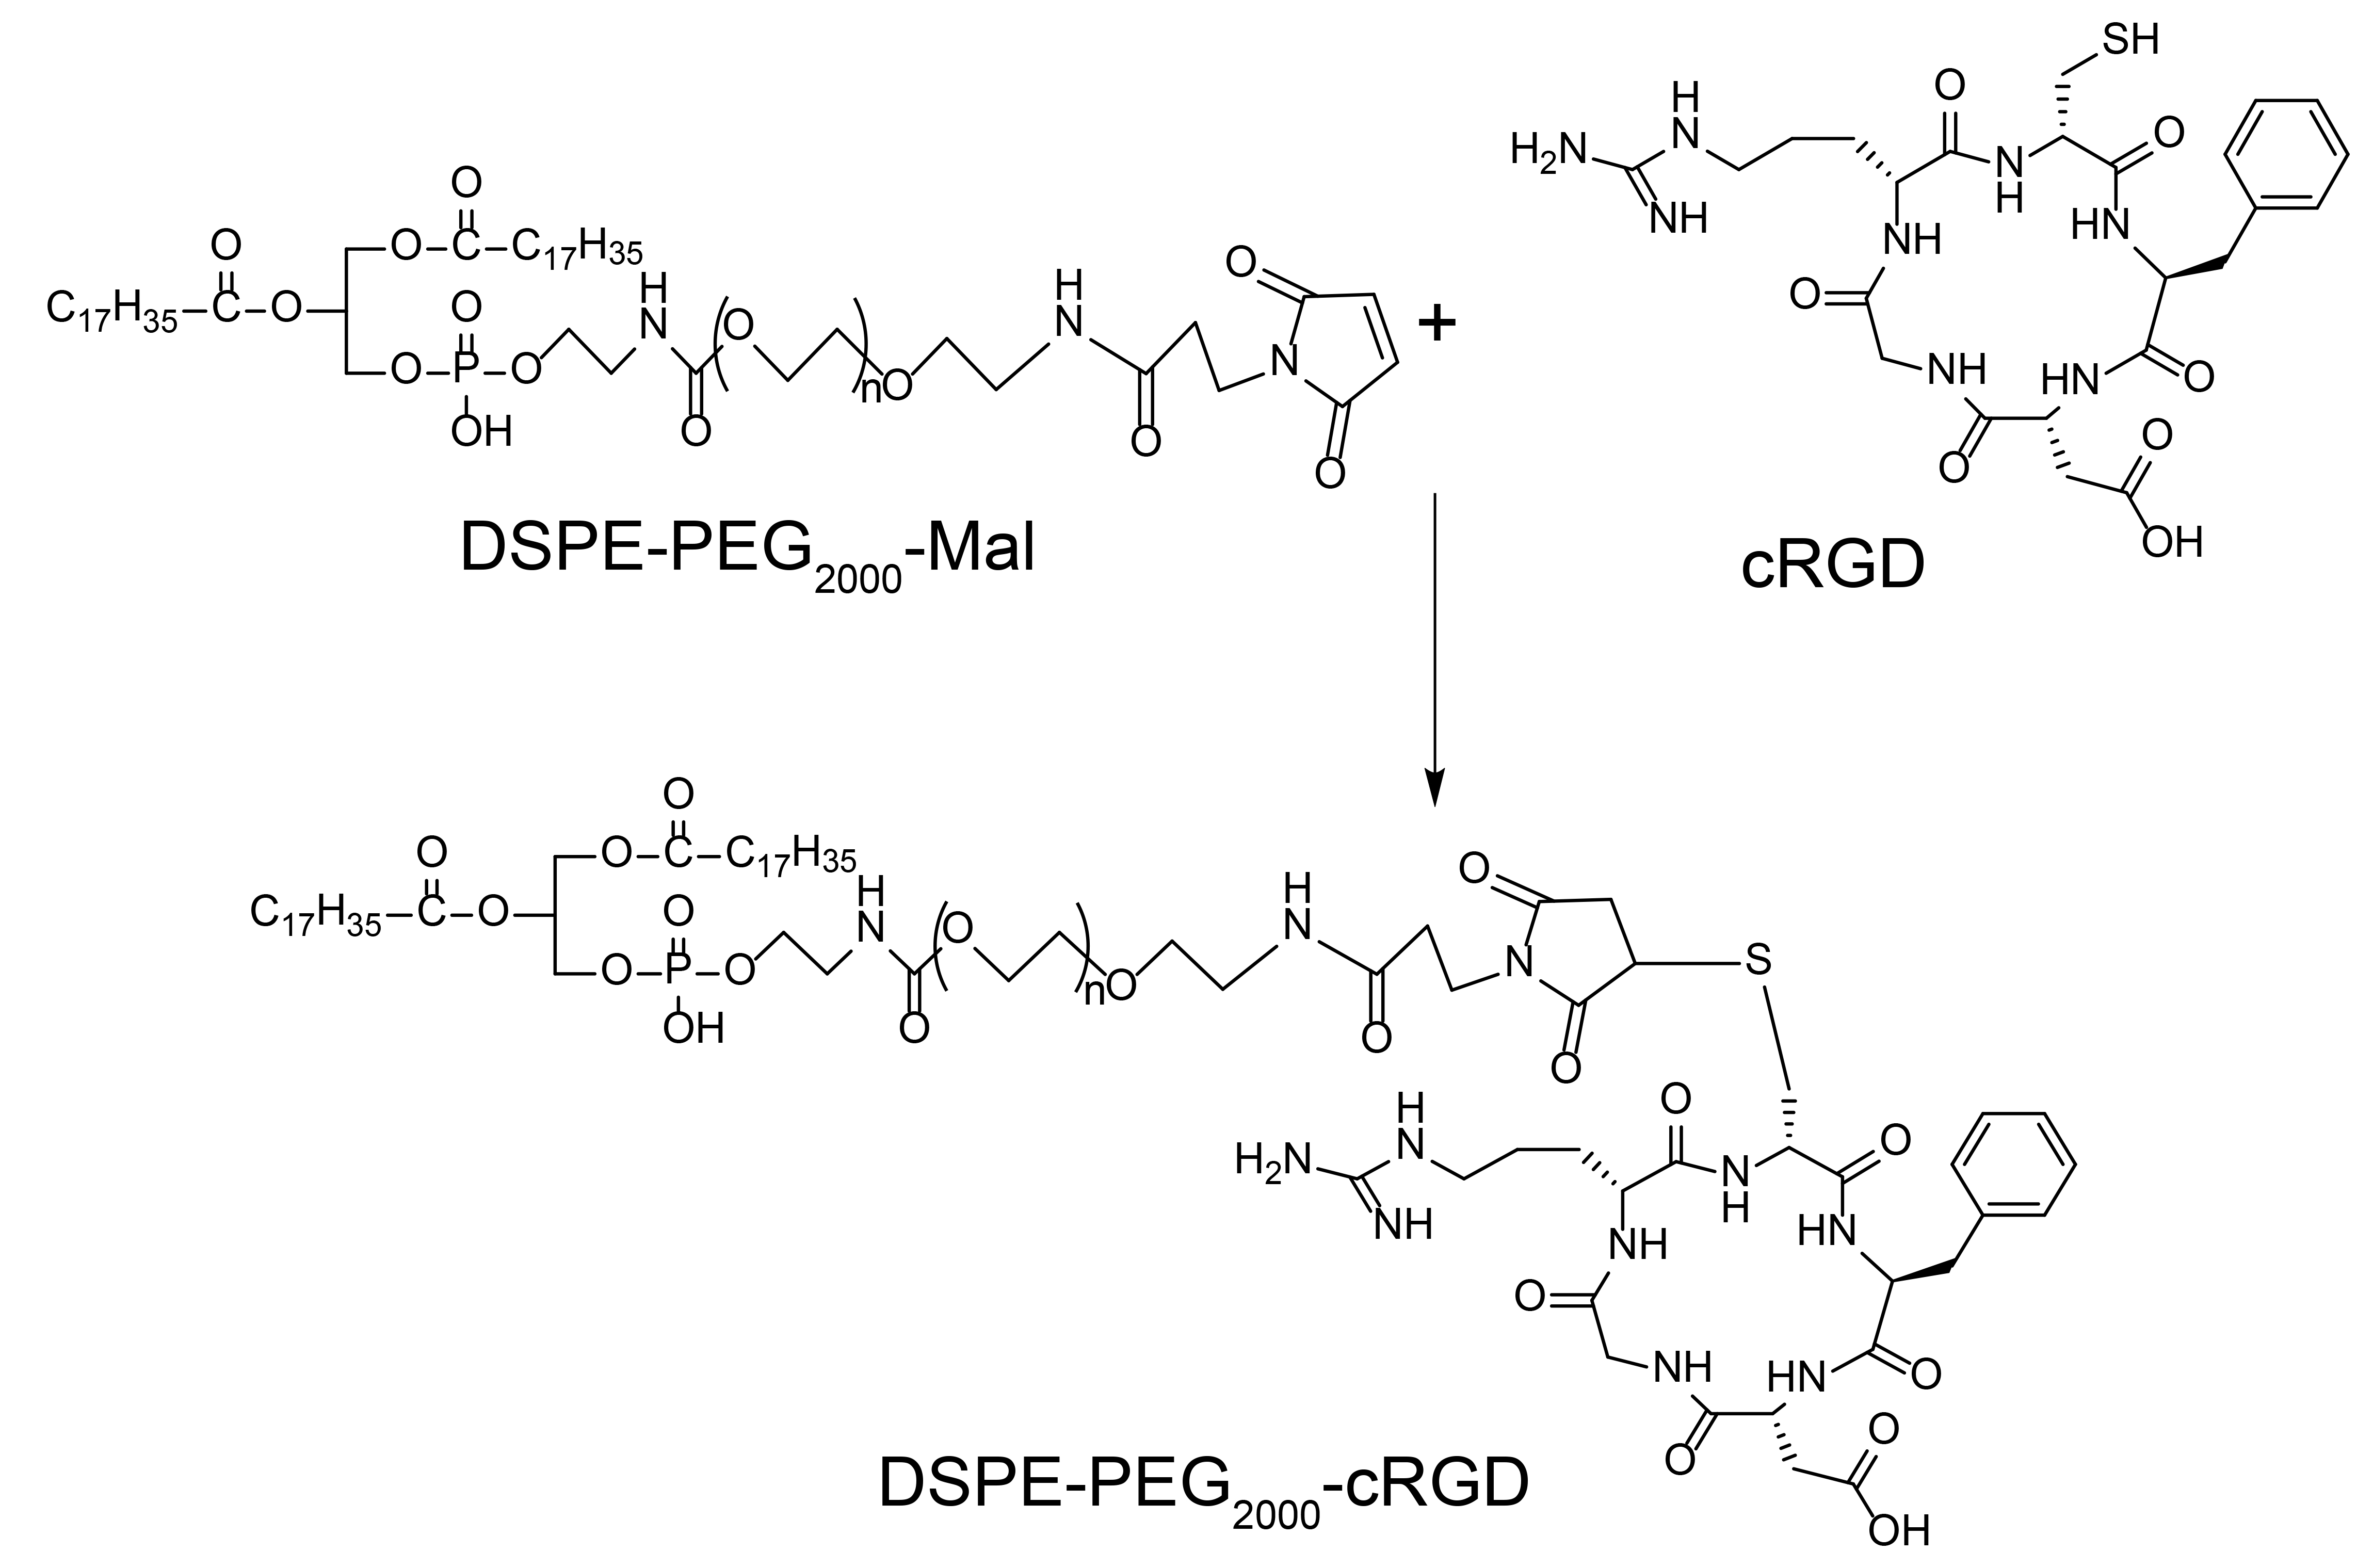


**Fig. S1.** Synthesis diagram of DSPE-PEG2000-cRGD from DSPE-PEG2000-Mal and cRGD at room temperature. cRGD, cyclic arginine-glycine-aspartic acid peptide; DSPE, distearoyl phosphatidyl ethanolamine; Mal, maleimide; PEG, polyethylene glycol


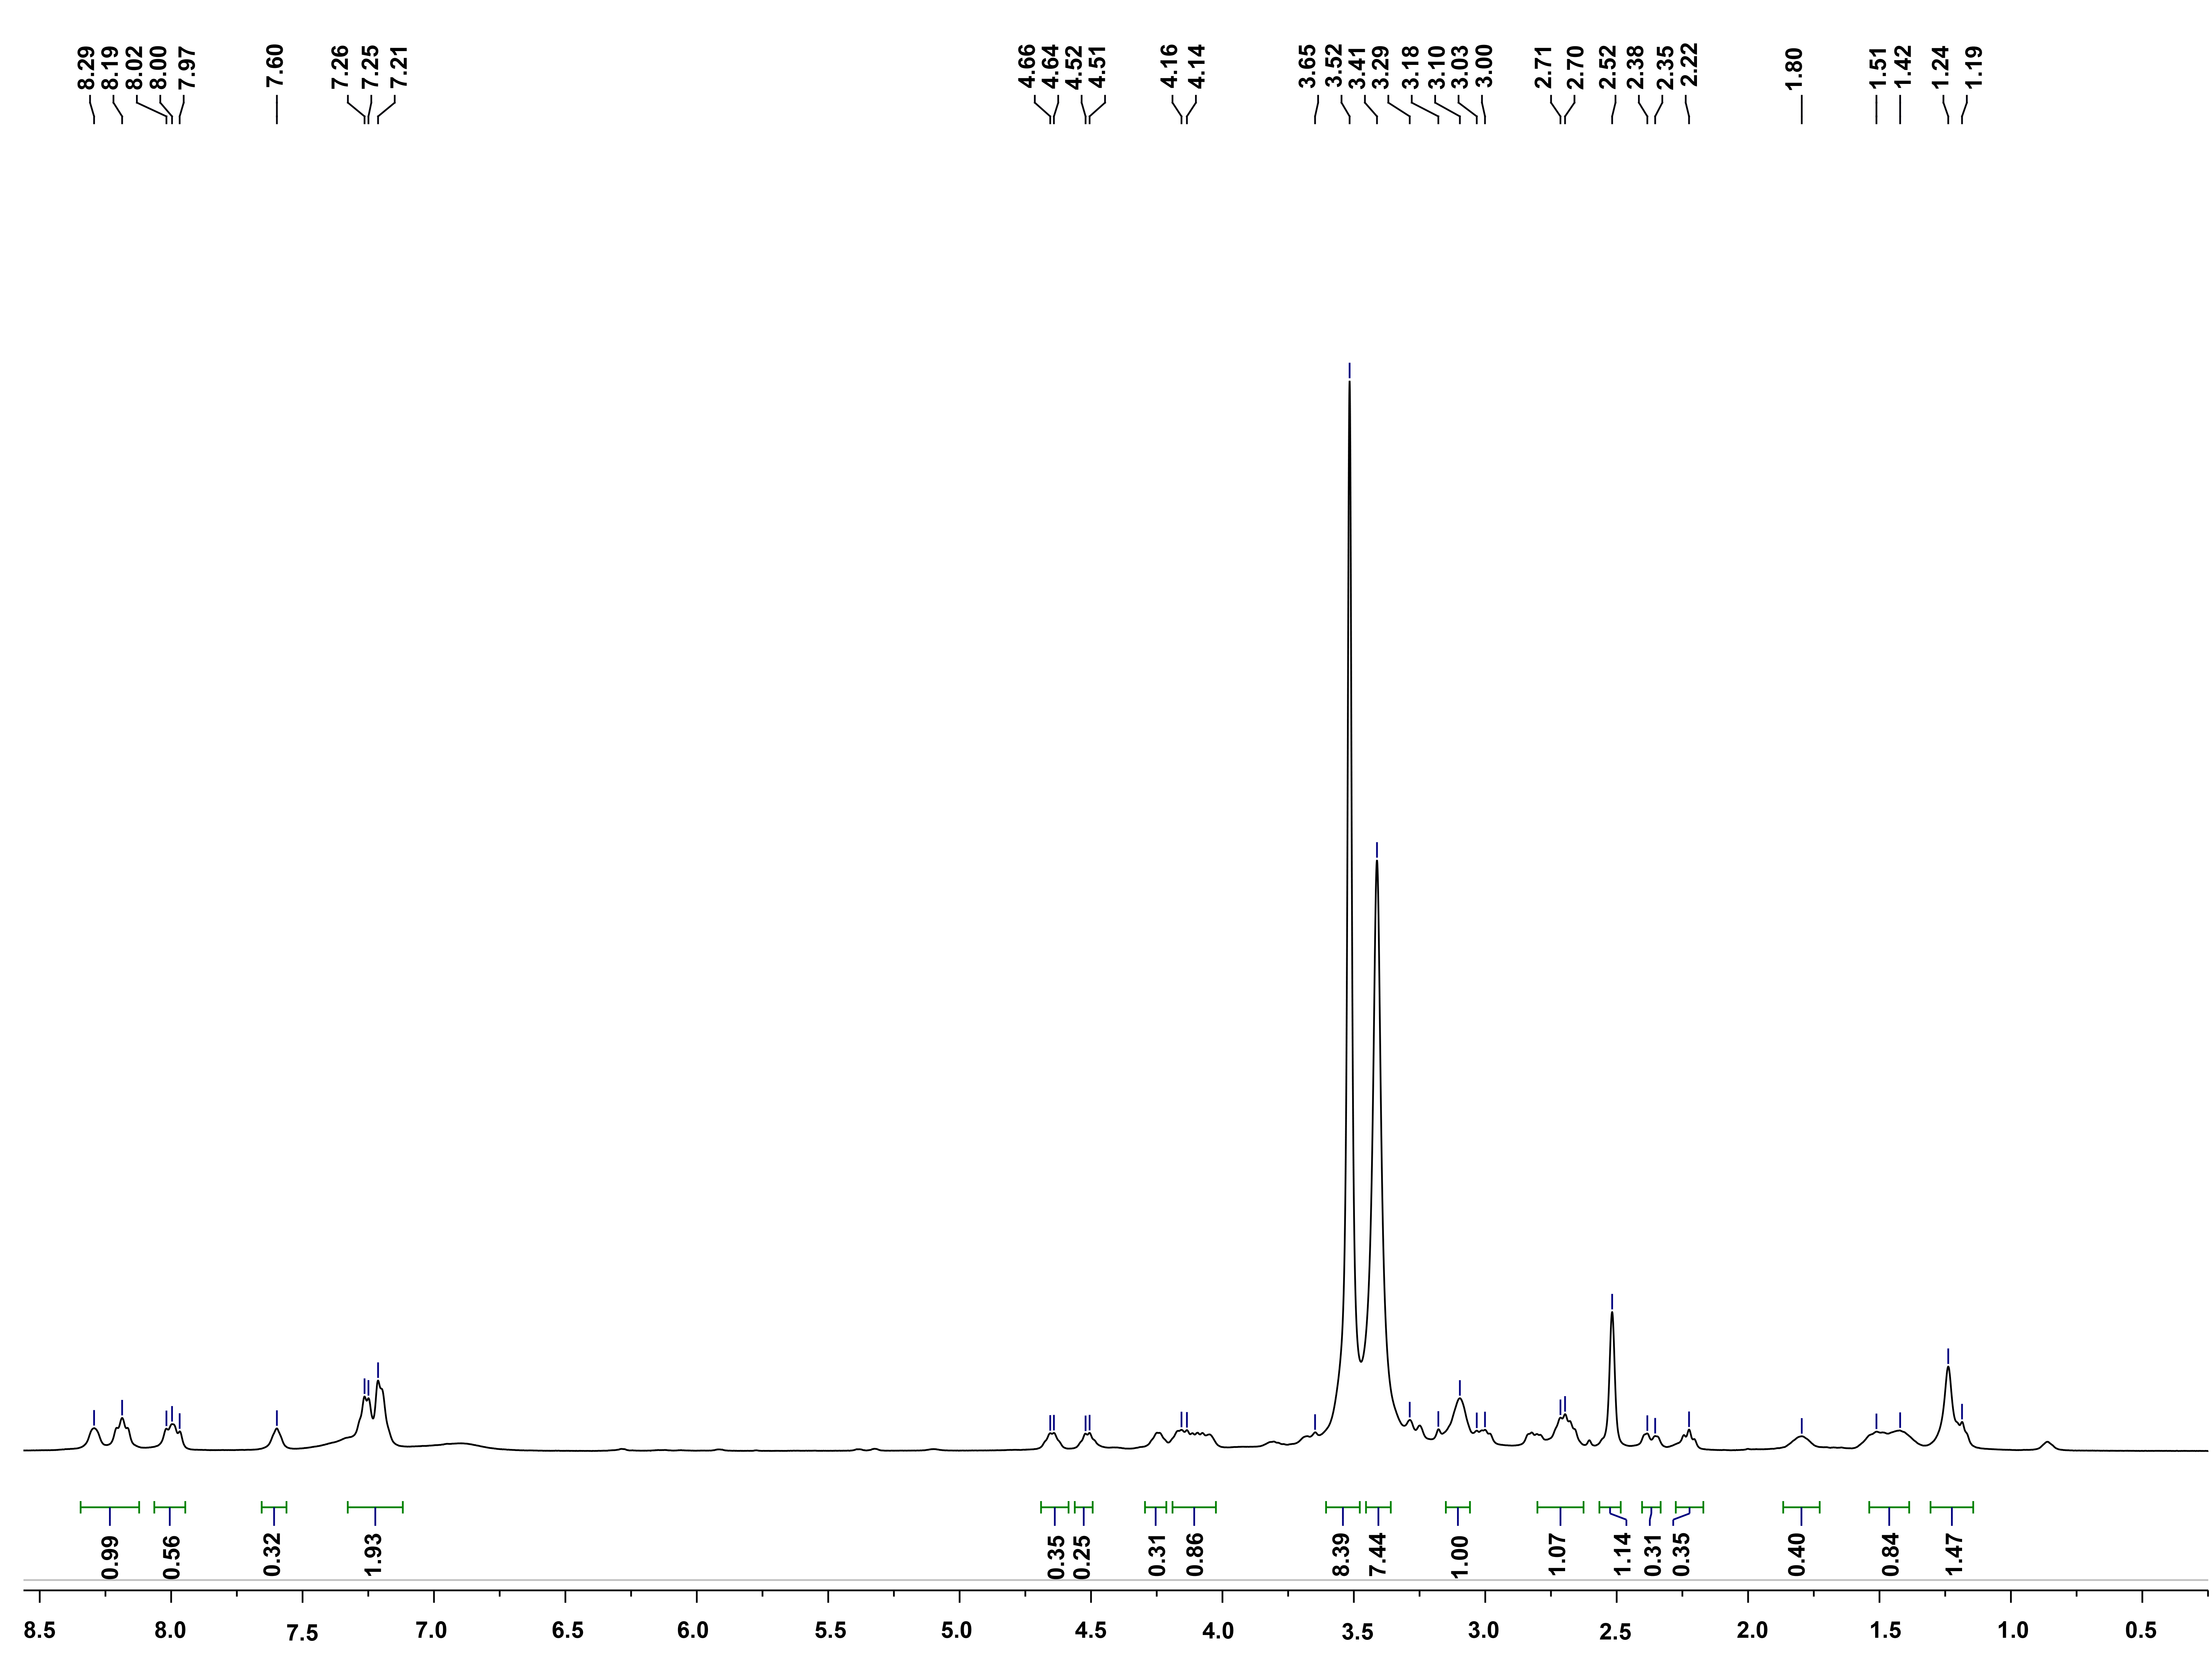


**Fig. S2.** 1H NMR spectrum of DSPE-PEG2000-cRGD in DMSO-*d*6 (400 MHz).

**
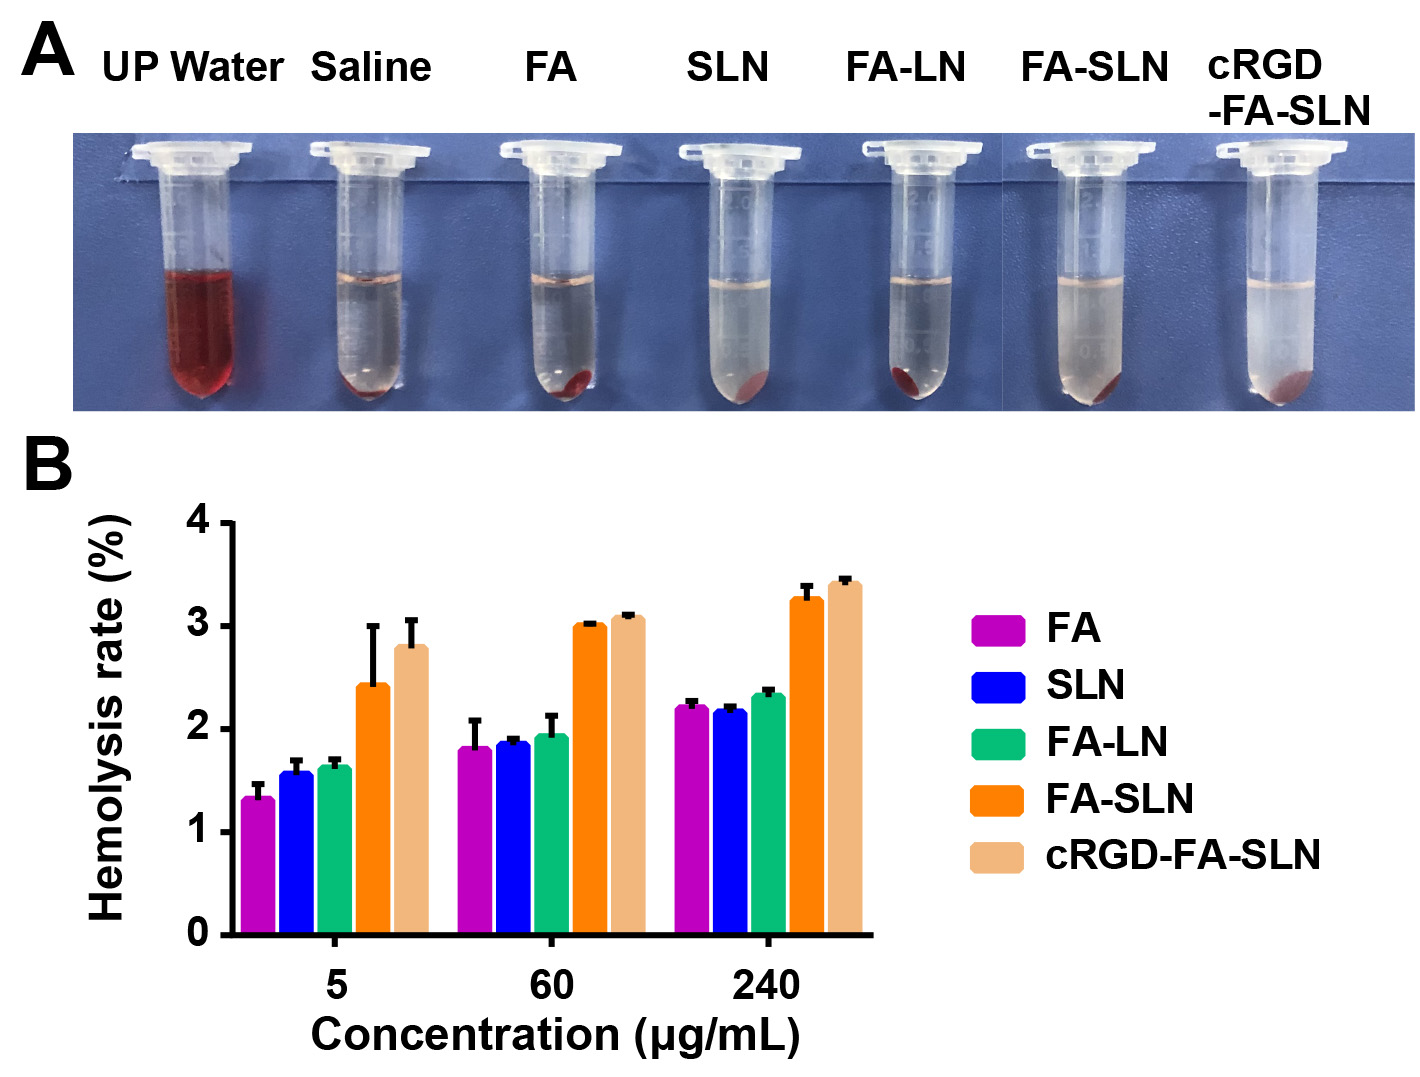
**

**Fig. S3.** Hemolytic potential of the prepared formulations. (A) Photographs of centrifuged whole-blood samples after treatment with various formulations. (B) Hemolysis rate induced by different formulations at various concentrations. Data are shown as mean ± SD (n = 3). cRGD, cyclic arginine-glycine-aspartic acid peptide; FA, flurbiprofen axetil; LN, lipid nanospheres; SLN, stealth lipid nanospheres.

**Table S1.** Actual values of independent variables at different levels.

| Independent variable | Level | | | | |
| --- | --- | --- | --- | --- | --- |
| -1.682 | -1 | 0 | +1 | +1.682 |
| X1 | 5 | 7.03 | 10 | 12.97 | 15 |
| X2 | 0.5 | 0.8 | 1.25 | 1.7 | 2 |
| X3 | 80 | 88.11 | 100 | 111.89 | 120 |

X1, soybean oil ratio (%); X2, lecithin ratio (%); X3, homogeneous pressure (MPa).**Table** **S2.** Experimental values of independent and dependent variables used in the central composite design (n = 3).

| Run | X1 | X2 | X3 | Y1 | Y2 |
| --- | --- | --- | --- | --- | --- |
| 1 | 10.00 | 1.25 | 120.00 | 266.51 | 90.12 |
| 2 | 10.00 | 1.25 | 100.00 | 234.24 | 95.74 |
| 3 | 10.00 | 2.00 | 100.00 | 300.71 | 92.11 |
| 4 | 10.00 | 1.25 | 80.00 | 274.32 | 88.41 |
| 5 | 10.00 | 1.25 | 100.00 | 234.22 | 94.88 |
| 6 | 7.03 | 0.80 | 111.89 | 312.54 | 78.17 |
| 7 | 10.00 | 1.25 | 100.00 | 238.54 | 96.38 |
| 8 | 15.00 | 1.25 | 100.00 | 272.34 | 90.32 |
| 9 | 12.97 | 0.80 | 111.89 | 244.87 | 85.63 |
| 10 | 12.97 | 0.80 | 88.11 | 303.36 | 87.25 |
| 11 | 7.03 | 0.80 | 88.11 | 342.57 | 73.36 |
| 12 | 5.00 | 1.25 | 100.00 | 298.14 | 84.33 |
| 13 | 7.03 | 1.70 | 111.89 | 314.58 | 88.36 |
| 14 | 10.00 | 1.25 | 100.00 | 237.47 | 95.36 |
| 15 | 10.00 | 0.50 | 100.00 | 273.21 | 72.33 |
| 16 | 7.03 | 1.70 | 88.11 | 364.32 | 81.12 |
| 17 | 10.00 | 1.25 | 100.00 | 243.55 | 96.34 |
| 18 | 10.00 | 1.25 | 100.00 | 237.41 | 95.47 |
| 19 | 12.97 | 1.70 | 111.89 | 283.22 | 89.11 |
| 20 | 12.97 | 1.70 | 88.11 | 300.22 | 84.39 |

X1, soybean oil ratio (%); X2, lecithin ratio (%); X3, homogeneous pressure (MPa); Y1, mean particle size (nm); Y2, encapsulation efficiency (%) of FA-SLN.

**Table S3.** Observed and predicted values of particle size and encapsulation efficiency under optimum conditions (n = 3).

| Variable | Optimized value | Response | Expected  value | Observed value | Mean ± SD  (%) |
| --- | --- | --- | --- | --- | --- |
| X1 | 11.24 | Y1 | 233.201 | 242.66 | 245.05 ± 2.36 |
| 247.38 |
| 245.12 |
| X2 | 1.32 | ⸺ | ⸺ | ⸺ | ⸺ |
| X3 | 103.29 | Y2 | 96.667 | 95.21 | 93.89 ± 1.58 |
| 94.33 |
| 92.14 |

X1, soybean oil ratio (%); X2, lecithin ratio (%); X3, homogeneous pressure (MPa); Y1, mean particle size (nm); Y2, encapsulation efficiency (%) of FA-SLN.

**Table S4.** **Physical characterization of lipid nanospheres (LN).**

| Formulation | Mean size (nm) | PDI | Zeta potential (mV) | | Content (%) | Encapsulation  efficiency (%) | |
| --- | --- | --- | --- | --- | --- | --- | --- |
| LN | 196 | 0.16 | -1.79 | ⸺ | | | ⸺ | |
| SLN | 223 | 0.17 | -1.67 | ⸺ | | | ⸺ | |
| FA-SLN | 245 | 0.19 | -1.15 | 97 | | | 93 | |
| cRGD-FA-SLN | 264 | 0.20 | -1.32 | 94 | | | 91 | |

cRGD, cyclic arginine-glycine-aspartic acid peptide; FA, flurbiprofen axetil; SLN, stealth lipid nanospheres .

**Table S5.** **Stability of FA-SLN and cRGD-FA-SLN at 4 °C.**

| Sample | Time (Day) | Appearance | Size (nm) | | PDI | Ke (%) |
| --- | --- | --- | --- | --- | --- | --- |
| FA-SLN | 0 | Uniform, milky white, free of oil droplets | 245.79 ±  2.83 | 0.188 ±  0.013 | | 8.25 ±  0.36 |
|  | 5 | No changes | 250.3 ±  1.73 | 0.192 ±  0.007 | | 8.68 ±  0.32 |
|  | 10 | No changes | 250.67 ±  2.80 | 0.213 ±  0.021 | | 8.75 ±  0.30 |
| cRGD-FA-SLN | 0 | Uniform, milky white, free of oil droplets | 262.01 ±  3.21 | 0.194 ±  0.013 | | 8.38 ±  0.56 |
|  | 5 | No changes | 263.89 ±  5.76 | 0.187 ±  0.006 | | 8.40 ±  0.21 |
|  | 10 | No changes | 266.45 ±  3.29 | 0.205 ±  0.008 | | 8.99 ±  0.33 |

Data are shown as mean ± SD (n = 3). cRGD, cyclic arginine-glycine-aspartic acid peptide; FA, flurbiprofen axetil; Ke, centrifugal stability constant; SLN, stealth lipid nanospheres.

**Table S6.** **Long-term stability of FA-SLN and cRGD-FA-SLN at 4 °C.**

| Sample | Time (Months) | Appearance | Size (nm) | PDI | Ke (%) |
| --- | --- | --- | --- | --- | --- |
| FA-SLN | 0 | Uniform, milky white, free of oil droplets | 242.75 ±  5.43 | 0.186 ±  0.010 | 8.15 ±  0.33 |
|  | 1 | No changes | 252.08 ±  3.98 | 0.187 ±  0.005 | 8.02 ±  0.35 |
|  | 2 | No changes | 256.60 ±  4.65 | 0.189 ±  0.009 | 8.22 ±  0.41 |
|  | 3 | No changes | 260.78 ±  4.37 | 0.194 ±  0.009 | 8.99 ±  0.30 |
| cRGD-FA-SLN | 0 | Uniform, milky white, free of oil droplets | 245.79 ±  2.83 | 0.183 ±  0.015 | 8.12 ±  0.57 |
|  | 1 | No changes | 265.13 ±  4.91 | 0.250 ±  0.026 | 11.05 ±  0.97 |
|  | 2 | Few oil drops | 307.69 ±  13.38 | 0.303 ±  0.031 | 14.41 ±  0.94 |
|  | 3 | Many oil drops | 360.61 ±  8.77 | 0.400 ±  0.046 | 22.12 ±  1.76 |

Data are shown as mean ± SD (n = 3). cRGD, cyclic arginine-glycine-aspartic acid peptide; FA, flurbiprofen axetil; Ke, centrifugal stability constant; SLN, stealth lipid nanospheres.

**Table S7. Stability of FA-SLN and cRGD-FA-SLN at 30 °C.**

| Sample | Time (Day) | Appearance | Size (nm) | PDI | Ke (%) |
| --- | --- | --- | --- | --- | --- |
| FA-SLN | 0 | Uniform, milky white, free of oil droplets | 245.79 ±  2.83 | 0.188 ±  0.013 | 8.12 ±  0.57 |
|  | 5 | Few oil drops | 389.91 ±  1.47 | 0.411 ±  0.004 | 32.18 ±  2.04 |
|  | 10 | Many oil drops | ⸺ | ⸺ | ⸺ |
| cRGD-FA-SLN | 0 | Uniform, milky white, free of oil droplets | 262.33 ±  3.47 | 0.195 ±  0.011 | 8.18 ±  0.58 |
|  | 5 | Few oil drops | 402.85 ±  8.38 | 0.425 ±  0.009 | 38.82 ±  2.42 |
|  | 10 | Many oil drops | ⸺ | ⸺ | ⸺ |

Data are shown as mean ± SD (n = 3). cRGD, cyclic arginine-glycine-aspartic acid peptide; FA, flurbiprofen axetil; Ke, centrifugal stability constant; SLN, stealth lipid nanospheres.

**Table S8.** **Pharmacokinetic parameters of FA in the plasma of healthy rats treated with different formulations.**

| Formulation | AUC0-t  (mg/L*h) | MRT0-t  (h) | Cmax  (mg/L) | T1/2z  (h) | CLz  (L/h/kg) | Tmax  (h) |
| --- | --- | --- | --- | --- | --- | --- |
| FA | 36.110 ±  2.108 | 3.412 ±  0.176 | 9.109 ±  0.223 | 3.399 ±  0.236 | 0.025 ±  0.002 | 0.083 |
| FA-LN | 47.951 ±  1.309 *** | 4.080 ±  0.077 **** | 9.074 ±  0.157 | 4.505 ±  0.405* | 0.018 ±  0.001*** | 0.167 |
| FA-SLN | 59.671 ±  1.774### | 4.849 ±  0.101#### | 9.016 ±  0.247 | 8.434 ±  0.319#### | 0.010 ±  0.001### | 0.500 |
| cRGD-FA-SLN | 60.672 ±  2.588 | 4.907 ±  0.025 | 9.021 ±  0.205 | 8.495 ±  0.610 | 0.010 ±  0.001 | 0.500 |

Data are shown as mean ± SD (n = 3). **P* < 0.05, ****P* < 0.001, *****P* < 0.0001 *vs* FA. ###*P* < 0.001, ####*P* < 0.0001 *vs* FA-LN. AUC0-t, area under the drug-time curve; CLz, clearance rate; cRGD, cyclic arginine-glycine-aspartic acid peptide; FA, flurbiprofen axetil; MRT0-t, mean residence time; SLN, stealth lipid nanospheres; T1/2z, half-life; Tmax, time to maximum plasma concentration.

**Table S9.** **Pharmacokinetic parameters of FA in the plasma of collagen-induced arthritic rats treated with different formulations.**

| Formulation | AUC0-t  (mg/L*h) | MRT0-t  (h) | Cmax  (mg/L) | T1/2z  (h) | CLz  (L/h/kg) | Tmax  (h) |
| --- | --- | --- | --- | --- | --- | --- |
| FA | 35.196 ±  1.766 | 3.391 ±  0.109 | 9.036 ±  0.168 | 3.447 ±  0.263 | 0.026 ±  0.002 | 0.083 |
| FA-LN | 47.595 ±  0.819**** | 4.163 ±  0.099**** | 8.901 ±  0.154 | 4.618 ±  0.205*** | 0.018 ±  0.001**** | 0.167 |
| FA-SLN | 59.279 ±  0.654#### | 4.908 ±  0.079#### | 8.929 ±  0.281 | 8.564 ±  0.314#### | 0.011 ±  0.001### | 0.500 |
| cRGD-FA-SLN | 59.527 ±  1.947 | 4.908 ±  0.037 | 8.909 ±  0.186 | 8.588 ±  0.232 | 0.011 ±  0.001 | 0.500 |

Data are shown as mean ± SD (n = 3). **P* < 0.05, ****P* < 0.001, *****P* < 0.0001 *vs* FA. ###*P* < 0.001, ####*P* < 0.0001 *vs* FA-LN. AUC0-t, area under the drug-time curve; CLz, clearance rate; cRGD, cyclic arginine-glycine-aspartic acid peptide; FA, flurbiprofen axetil; MRT0-t, mean residence time; SLN, stealth lipid nanospheres; T1/2z, half-life; Tmax, time to maximum plasma concentration.

**Table S10.** **Heat pain threshold of collagen-induced arthritic rats after various treatments.**

| Treatment | Foot licking time (s) | | |
| --- | --- | --- | --- |
| 15 min | 30 min | 60 min |
| Saline | 10.68 ± 2.34**** | 10.81 ± 3.65**** | 10.15 ± 2.57**** |
| FA-SLN | 27.31 ± 2.60 | 30.64 ± 2.36 | 26.48 ± 3.07 |
| cRGD-FA-SLN | 36.40 ± 2.44*** | 41.50 ± 2.12**** | 35.23 ± 3.47** |

Data are shown as mean ± SD (n = 5). ***P* < 0.01, ****P* < 0.001, *****P* < 0.0001 *vs* FA-SLN. cRGD, cyclic arginine-glycine-aspartic acid peptide; FA, flurbiprofen axetil; SLN, stealth lipid nanospheres.

**Table S11.** **Effect of various treatments on the torsional response of collagen-induced arthritic rats intraperitoneally injected with acetic acid.**

| Treatment | Number of body torsions |
| --- | --- |
| Saline | 31.67 ± 4.04**** |
| FA-SLN | 15.33 ± 3.51 |
| cRGD-FA-SLN | 14.33 ± 2.52 |

Data are shown as mean ± SD (n = 5). ****P < 0.0001 *vs* FA-SLN. cRGD, cyclic arginine-glycine-aspartic acid peptide; FA, flurbiprofen axetil; SLN, stealth lipid nanospheres.
